# Supplementary material for: A droplet-based microfluidic platform enables high-throughput combinatorial optimization of cyanobacterial cultivation
Source: PubMed Central journal article supplement (PMC9477827; doi:10.1038/s41598-022-19773-6), 2022-09-15
Supplement: 41598_2022_19773_MOESM1_ESM.pdf [file 41598_2022_19773_MOESM1_ESM.pdf]

## Supplementary Material

### **A droplet-based microfluidic platform enables high-throughput combinatorial optimization of cyanobacterial cultivation**

Jialan Cao<sup>1†</sup>, David A. Russo<sup>2</sup>, Ting Xie<sup>1</sup>, G. Alexander Groß<sup>1</sup>, and Julie A. Z. Zedler<sup>3†</sup>

<sup>1</sup>Ilmenau University of Technology, Institute for Chemistry and Biotechnology, Dept. Physical Chemistry and Microreaction Technology, Weimarerstr. 32, D-98693 Ilmenau, Germany

<sup>2</sup>Friedrich Schiller University Jena, Institute for Inorganic and Analytical Chemistry, Bioorganic Analytics, Lessingstr. 8, D-07743 Jena, Germany

<sup>3</sup>Friedrich Schiller University Jena, Matthias Schleiden Institute for Genetics, Bioinformatics and Molecular Botany, Synthetic Biology of Photosynthetic Organisms, Dornburgerstr. 159, D-07743 Jena, Germany

†Correspondence: [jialan.cao@tu-ilmenau.de](mailto:jialan.cao@tu-ilmenau.de); [julie.zedler@uni-jena.de](mailto:julie.zedler@uni-jena.de)

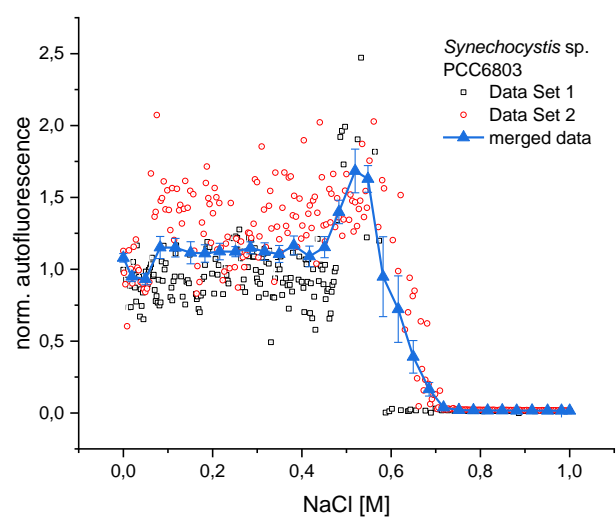

**Supplementary Fig. 1** A representative example of how the microdroplet raw data is visualized and treated for each experiment. Details can be found in the Materials & Methods section “Statistics and Reproducibility”.

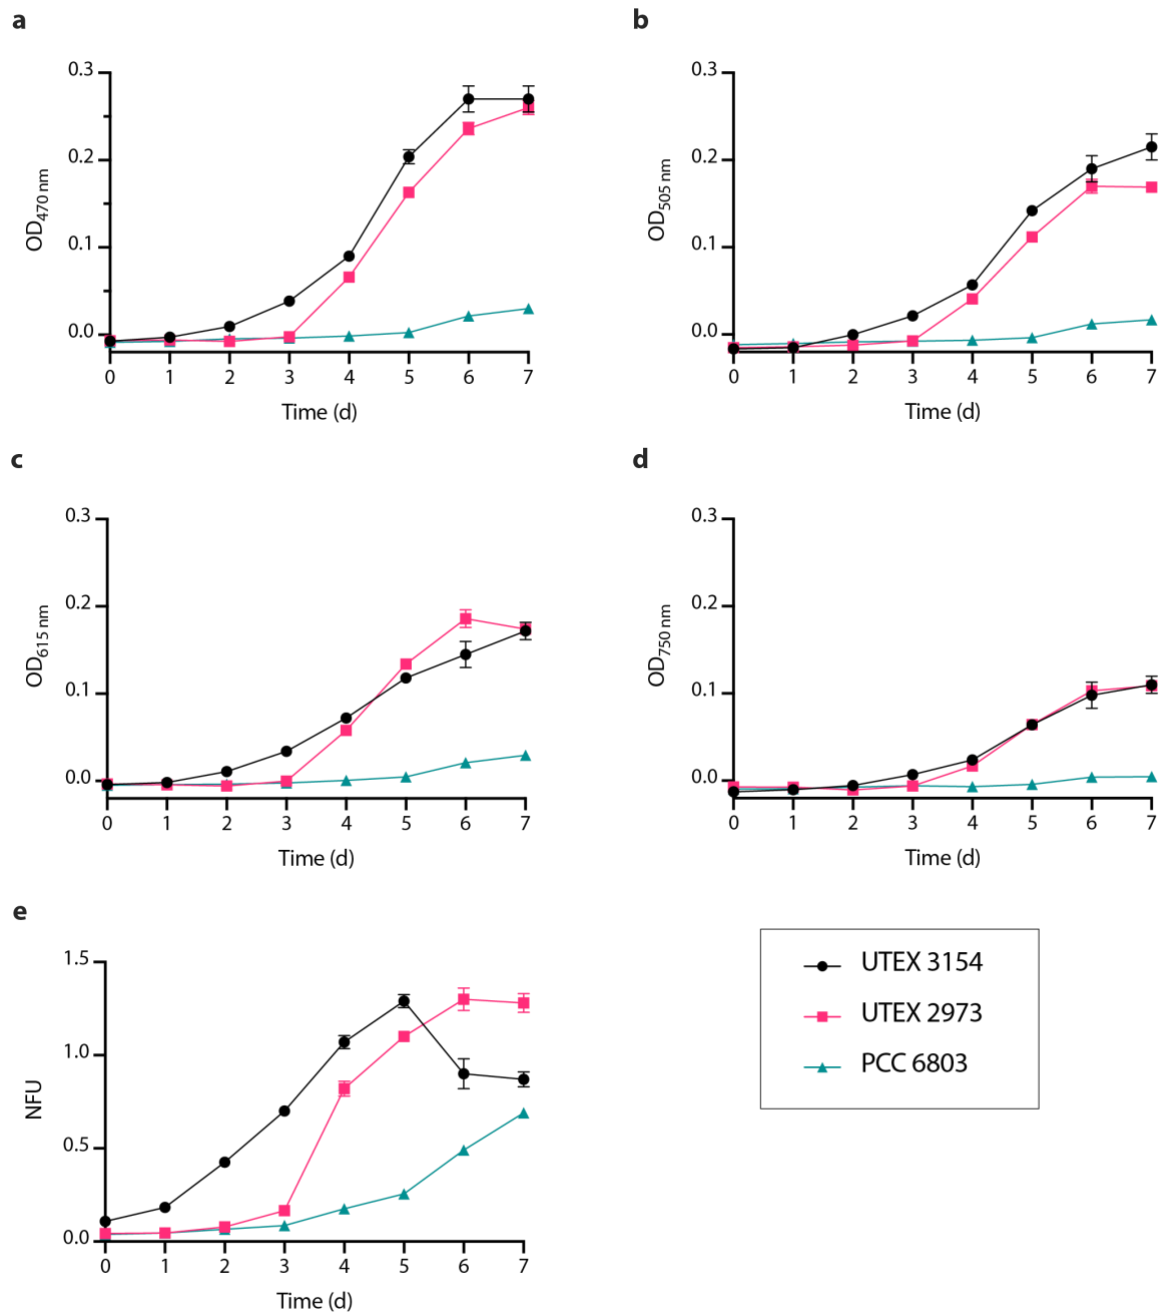

**Supplementary Fig. 2** Growth kinetics of three cyanobacterial strains in microdroplet setup over a period of 7 days. Measurements of multi-channel photofluorimeter with different extinction wavelengths and fluorescence. **a** optical density (OD) at 470 nm, **b** OD at 505 nm, **c** OD at 615 nm, **d** OD at 750 nm and **e** normalized fluorescence units (NFU) (excitation: 405 nm, emission: 425 nm). Data points are averages of approximately 50 droplets. Error bars represent standard deviation.
